# Supplementary material for: Protonation induced shifting of electron-accepting centers in intramolecular charge transfer chromophores: a theoretical study
Source: Royal Society of Chemistry journal article supplement (doi:10.1039/c4cp02410a), 2014-01-01
Supplement: c4cp02410a1.pdf [file c4cp02410a1.pdf]

(c)

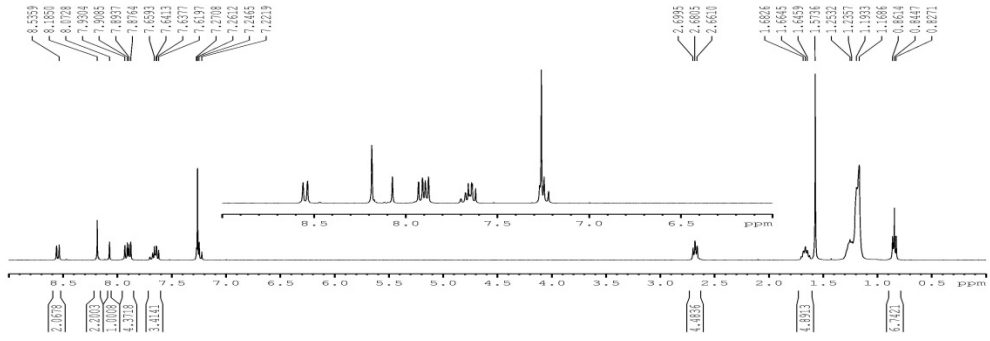

(d)

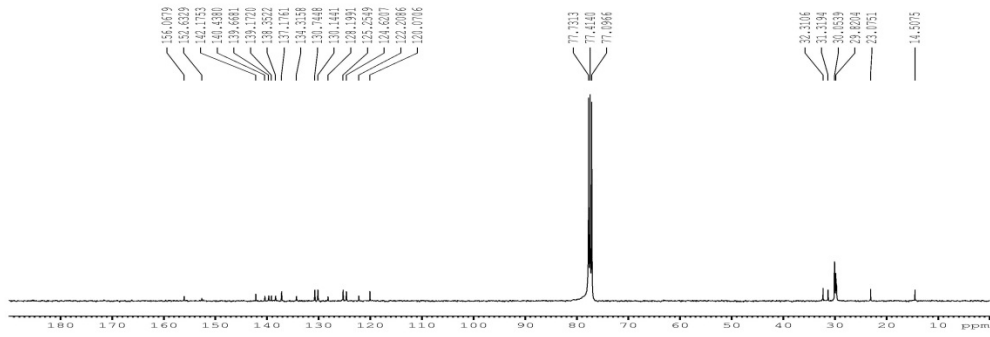

(e)

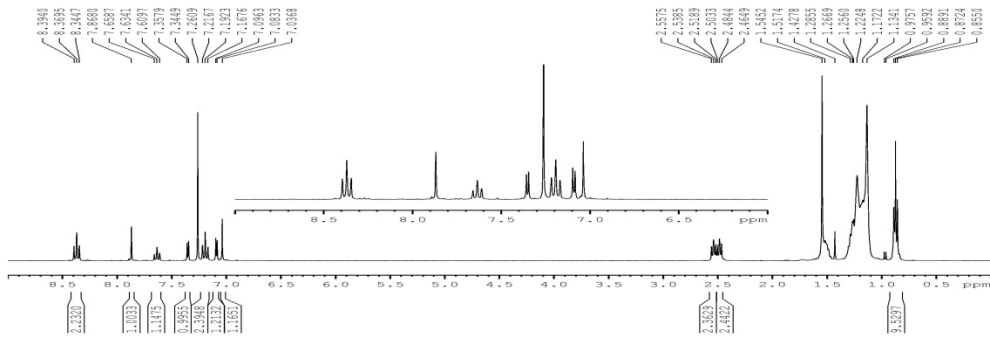

(f)

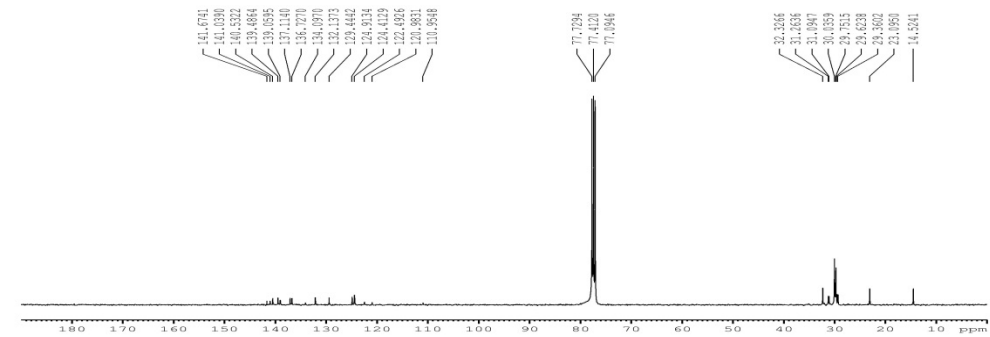

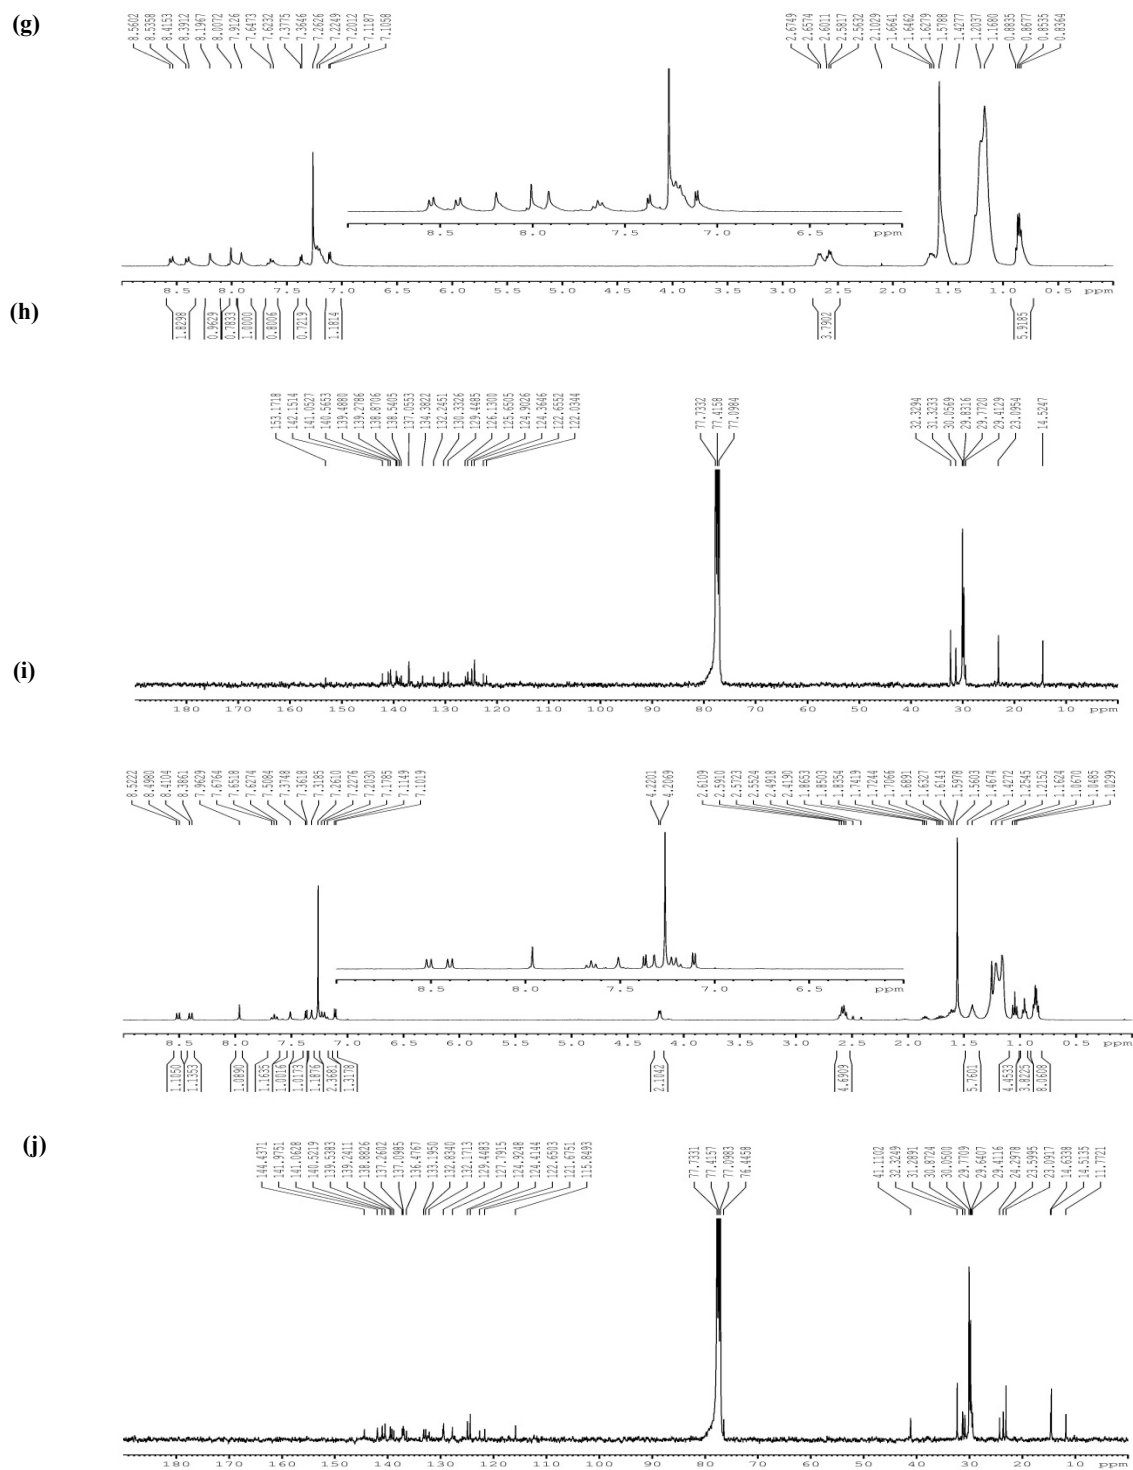

**Fig. S1** NMR spectra of monomers and polymer. (a) and (b), <sup>1</sup>H-NMR and <sup>13</sup>C-NMR spectra of monomer **BTaz-1**; (c) and (d), <sup>1</sup>H-NMR and <sup>13</sup>C-NMR spectra of monomer **BTaz-2**; (e) and (f), <sup>1</sup>H-NMR and <sup>13</sup>C-NMR spectra of monomer 5-bromo-3-dodecyl-2-(3-(3-dodecylthiophen-2-yl)azulen-1-yl)thiophene **5**; (g) and (h), <sup>1</sup>H-NMR and <sup>13</sup>C-NMR spectra of monomer **BTaz-3**; (i) and (j), <sup>1</sup>H-NMR and <sup>13</sup>C-NMR spectra of monomer **BTaz-4**.

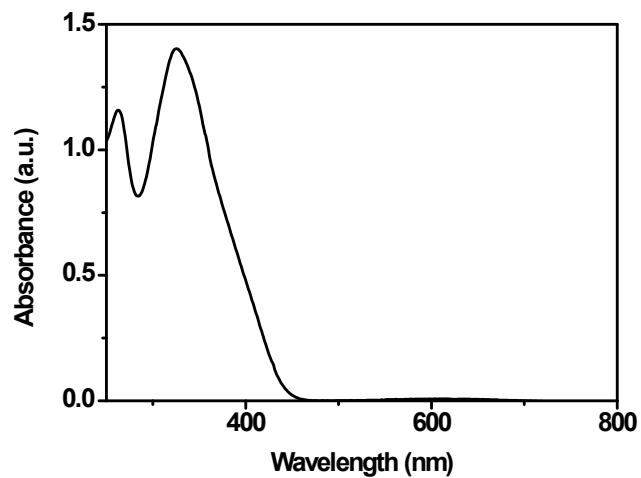

Fig. S2 UV-vis spectrum of BTATB in chloroform.

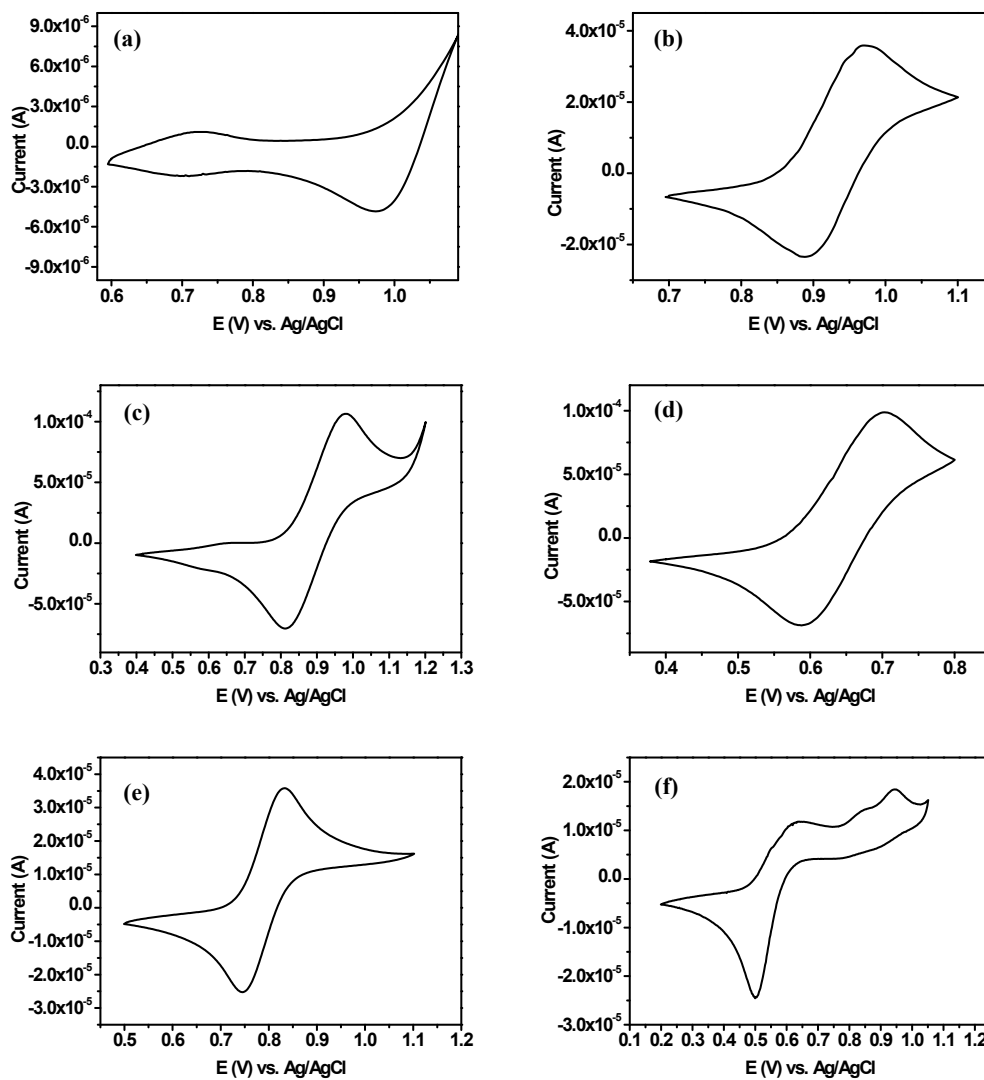

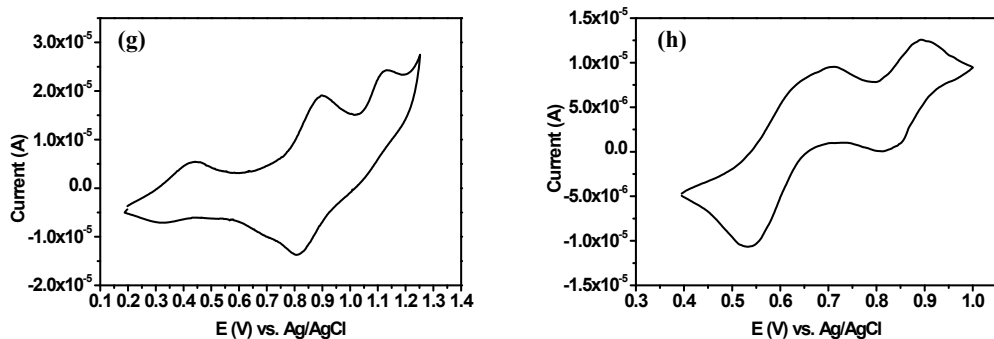

**Fig. S3** Cyclic voltammograms of **BTaz-1** (a and b), **BTaz-2** (c and d), **BTaz-3** (e and f) and **BTaz-4** (g and h) in dichloromethane (a, c, e and g) and dichloromethane/TFA (v/v:8.5/1.5; b, d, f and h). CV experiments (a-h) performed with 0.1 mM oligomer and 0.1 M tetrabutylammonium perchlorate (scan rate 25 mV/s).

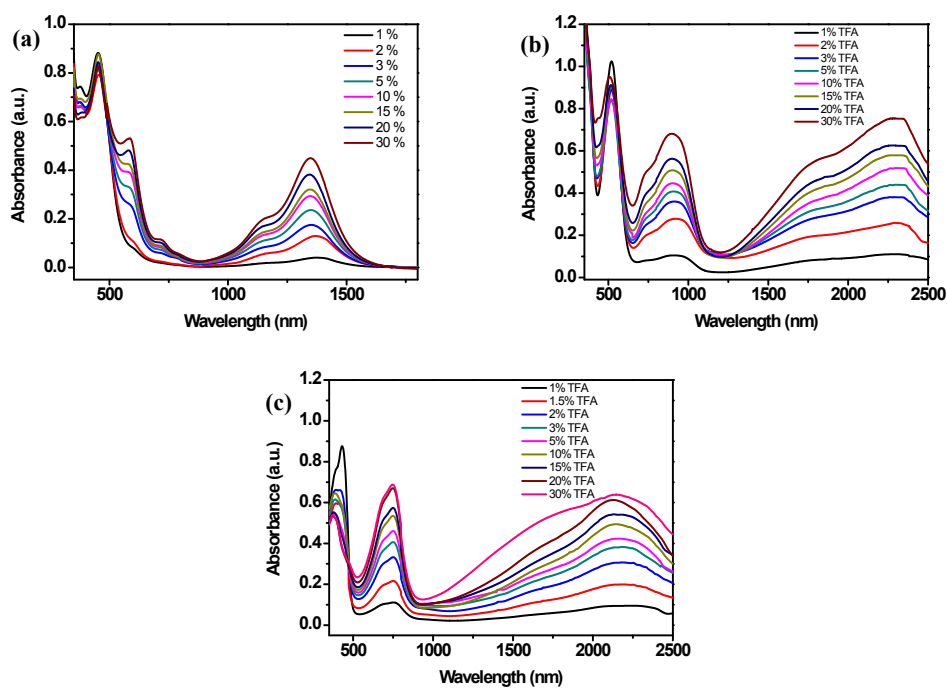

**Fig. S4** UV-vis-NIR spectrum of **BTazs** under different TFA concentration in chloroform solution: (a) **BTaz-2**; (b) **BTaz-3**; (c) **BTaz-4**.

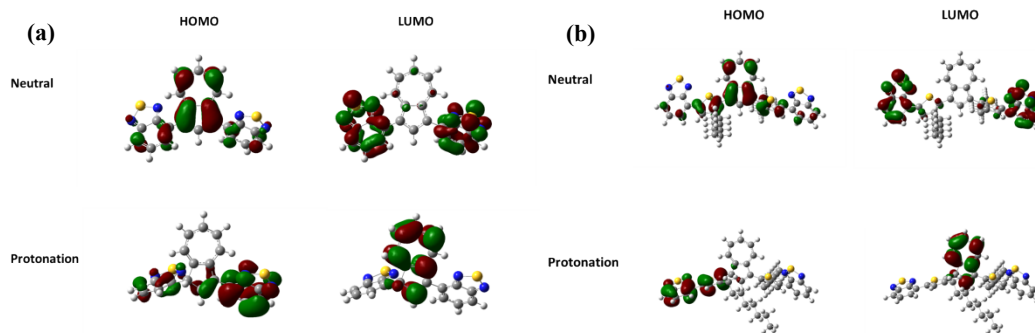

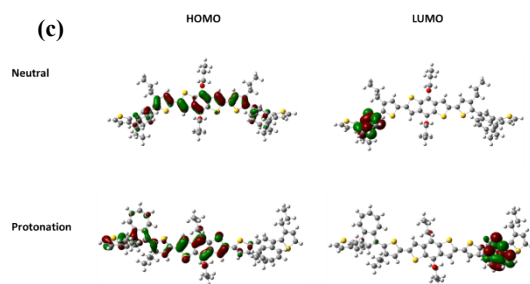

**Fig. S5** Spatial distributions of the calculated HOMOs and LUMOs of model compounds **BTaz-1** (a), **BTaz-2** (b), and **BTaz-4** (c) at different degree of protonation: neutral and protonation.

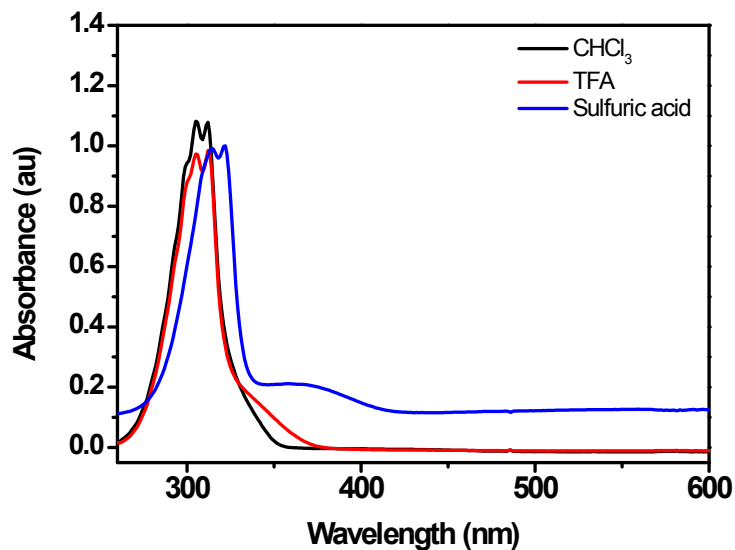

**Fig. S6** UV-Vis spectra of 2,1,3-benzothiadiazole in chloroform (dark line); chloroform/TFA (v/v: 7/3, red line) and chloroform/sulfuric acid (v/v: 7/3, blue line).

### Cartesian coordinates of the DFT optimized ground-state

#### Cartesian coordinates of the DFT optimized ground-state of BTaz-1

|   |          |          |          |   |          |          |          |
|---|----------|----------|----------|---|----------|----------|----------|
| C | -2.44847 | -0.87882 | 0.605565 | C | 4.941283 | -1.10619 | -0.3267  |
| C | -1.20419 | 3.510492 | 0.37495  | C | 3.681084 | -0.46385 | 0.018284 |
| C | 0.000007 | 4.109789 | 0.000001 | C | -2.55622 | -1.91411 | 1.517202 |
| C | 1.204204 | 3.510485 | -0.37495 | C | -3.79356 | -2.54112 | 1.852378 |
| C | 1.522541 | 2.151277 | -0.43728 | C | -4.98093 | -2.1572  | 1.285319 |
| C | 0.725357 | 1.040488 | -0.1704  | C | -4.94129 | -1.10617 | 0.326703 |
| C | -0.72535 | 1.040493 | 0.1704   | C | -3.68109 | -0.46385 | -0.01829 |
| C | -1.52253 | 2.151282 | 0.437281 | N | -3.81057 | 0.481142 | -0.95747 |
| C | -1.13386 | -0.31876 | 0.256345 | S | -5.40715 | 0.542306 | -1.34591 |

|   |          |          |          |   |          |          |          |
|---|----------|----------|----------|---|----------|----------|----------|
| C | -4E-06   | -1.11043 | 0.000003 | N | -5.9937  | -0.62536 | -0.34752 |
| C | 1.133859 | -0.31877 | -0.25634 | N | 3.810576 | 0.481153 | 0.957454 |
| H | -2.0107  | 4.191694 | 0.636388 | S | 5.407152 | 0.542324 | 1.345875 |
| H | 0.000011 | 5.198651 | 0.000001 | N | 5.9937   | -0.62535 | 0.347502 |
| H | 2.010712 | 4.191686 | -0.63639 | H | 1.654711 | -2.25642 | -2.01712 |
| H | 2.545022 | 1.930113 | -0.72758 | H | 3.781227 | -3.34119 | -2.58759 |
| C | -2.54501 | 1.930122 | 0.727579 | H | 5.927351 | -2.62455 | -1.53413 |
| C | 2.44846  | -0.87883 | -0.60556 | H | -1.65473 | -2.25639 | 2.017155 |
| C | 2.556213 | -1.91414 | -1.51718 | H | -3.78125 | -3.34114 | 2.587634 |
| C | 3.793549 | -2.54116 | -1.85234 | H | -5.92736 | -2.62451 | 1.534155 |
| C | 4.980921 | -2.15723 | -1.2853  | H | -5E-06   | -2.19544 | 0.000004 |

**Cartesian coordinates of the DFT optimized ground-state of BTaz-2**

|   |          |          |          |   |          |          |          |
|---|----------|----------|----------|---|----------|----------|----------|
| C | -6.35522 | 0.348308 | -0.58816 | S | 3.799919 | -0.70561 | 0.590867 |
| C | -4.96206 | -0.07338 | -0.46508 | H | 4.873597 | 1.739366 | -1.85009 |
| C | -4.34201 | -1.0948  | -1.15719 | C | 2.140733 | 2.383061 | -1.48266 |
| C | -2.96004 | -1.26959 | -0.87241 | C | 2.57201  | 3.785768 | -1.00839 |
| C | -2.50599 | -0.35743 | 0.067449 | C | 1.760531 | 4.913025 | -1.65885 |
| S | -3.79992 | 0.70561  | 0.590867 | C | 2.181531 | 6.313217 | -1.19391 |
| H | -4.8736  | -1.73936 | -1.8501  | H | 2.22174  | 2.338403 | -2.57856 |
| C | -2.14073 | -2.38306 | -1.48267 | H | 1.082103 | 2.239044 | -1.24468 |
| C | -2.57201 | -3.78577 | -1.00839 | H | 3.63984  | 3.933508 | -1.2227  |
| C | -1.76053 | -4.91302 | -1.65885 | H | 2.470741 | 3.838287 | 0.084175 |
| C | -2.18153 | -6.31322 | -1.19391 | H | 0.692401 | 4.763832 | -1.44296 |
| H | -2.22174 | -2.3384  | -2.57856 | H | 1.860837 | 4.848044 | -2.75283 |
| H | -1.0821  | -2.23904 | -1.24469 | H | 3.252512 | 6.457367 | -1.40075 |
| H | -3.63984 | -3.93351 | -1.22269 | H | 2.072402 | 6.380709 | -0.10138 |
| H | -2.47073 | -3.83828 | 0.084174 | C | 1.382404 | 7.444423 | -1.85403 |
| H | -0.6924  | -4.76383 | -1.44297 | C | 1.80455  | 8.844521 | -1.39058 |
| H | -1.86084 | -4.84804 | -2.75283 | C | 1.012082 | 9.977121 | -2.05606 |
| H | -3.25251 | -6.45737 | -1.40074 | C | 1.4409   | 11.37153 | -1.58784 |
| H | -2.07239 | -6.38071 | -0.10138 | H | 1.491828 | 7.375709 | -2.94677 |
| C | -1.3824  | -7.44442 | -1.85404 | H | 0.311419 | 7.301166 | -1.64745 |
| C | -1.80455 | -8.84452 | -1.39058 | H | 2.876946 | 8.986352 | -1.59241 |
| C | -1.01208 | -9.97712 | -2.05607 | H | 1.690405 | 8.916072 | -0.29849 |
| C | -1.4409  | -11.3715 | -1.58784 | H | -0.0593  | 9.836656 | -1.85385 |
| H | -1.49184 | -7.37571 | -2.94677 | H | 1.126566 | 9.905984 | -3.14719 |
| H | -0.31142 | -7.30116 | -1.64747 | H | 0.858363 | 12.15743 | -2.08219 |
| H | -2.87694 | -8.98635 | -1.5924  | H | 2.500273 | 11.55467 | -1.80635 |
| H | -1.69039 | -8.91607 | -0.29849 | H | 1.303047 | 11.48583 | -0.50548 |
| H | 0.059303 | -9.83665 | -1.85387 | C | 6.355217 | -0.34831 | -0.58816 |
| H | -1.12658 | -9.90598 | -3.1472  | C | 7.145805 | 0.055451 | -1.65369 |
| H | -0.85836 | -12.1574 | -2.08219 | C | 8.515399 | -0.30738 | -1.79494 |
| H | -2.50027 | -11.5547 | -1.80634 | C | 9.160123 | -1.10938 | -0.88752 |
| H | -1.30303 | -11.4858 | -0.50548 | C | 8.402783 | -1.57747 | 0.221014 |
| C | -1.23389 | -0.2674  | 4.416549 | C | 7.00578  | -1.2021  | 0.375432 |
| C | -1E-06   | -2E-06   | 5.014197 | C | -7.14581 | -0.05545 | -1.65369 |

|   |          |          |          |   |          |          |          |
|---|----------|----------|----------|---|----------|----------|----------|
| C | 1.233888 | 0.267393 | 4.416549 | C | -8.5154  | 0.307375 | -1.79494 |
| C | 1.556331 | 0.305171 | 3.056371 | C | -9.16012 | 1.10938  | -0.88752 |
| C | 0.736365 | 0.115421 | 1.947022 | C | -8.40278 | 1.577466 | 0.221015 |
| C | -0.73637 | -0.11542 | 1.947022 | C | -7.00578 | 1.202099 | 0.375431 |
| C | -1.55633 | -0.30517 | 3.056371 | N | -6.43621 | 1.725183 | 1.464617 |
| C | -1.15044 | -0.1692  | 0.58698  | S | -7.59137 | 2.620235 | 2.219816 |
| C | 0        | 0        | -0.20766 | N | -8.85465 | 2.374801 | 1.197423 |
| C | 1.150437 | 0.169198 | 0.586981 | N | 6.436208 | -1.72518 | 1.464617 |
| H | -2.05935 | -0.45865 | 5.098262 | S | 7.591369 | -2.62024 | 2.219816 |
| H | -1E-06   | -2E-06   | 6.10312  | N | 8.854647 | -2.3748  | 1.197422 |
| H | 2.059343 | 0.45865  | 5.098263 | H | 6.704471 | 0.668841 | -2.43228 |
| H | 2.600396 | 0.511757 | 2.831513 | H | 9.054003 | 0.06401  | -2.66248 |
| H | -2.6004  | -0.51176 | 2.831512 | H | 10.20059 | -1.39548 | -0.99264 |
| C | 4.962064 | 0.073382 | -0.46508 | H | -6.70447 | -0.66884 | -2.43228 |
| C | 4.342013 | 1.094806 | -1.15719 | H | -9.05401 | -0.06401 | -2.66248 |
| C | 2.960042 | 1.269592 | -0.8724  | H | -10.2006 | 1.395479 | -0.99264 |
| C | 2.505991 | 0.357433 | 0.06745  | H | 0        | 0.000001 | -1.29169 |

### Cartesian coordinates of the DFT optimized ground-state of BTaz-3

|   |          |          |          |   |          |          |          |
|---|----------|----------|----------|---|----------|----------|----------|
| N | 1.243697 | -1.25958 | -0.15913 | H | 8.906459 | -1.35218 | 5.620416 |
| C | 0.722784 | -0.03157 | -0.09291 | C | -2.91419 | 1.240454 | 0.385147 |
| C | -0.72279 | -0.03157 | 0.092826 | C | -3.68287 | 2.362089 | 0.635709 |
| N | -1.24371 | -1.25958 | 0.158999 | C | -5.07762 | 2.126613 | 0.767926 |
| S | -1.1E-05 | -2.32099 | -8.9E-05 | C | -5.39376 | 0.785182 | 0.617169 |
| C | -1.47092 | 1.193302 | 0.189632 | S | -3.95481 | -0.17058 | 0.30825  |
| C | -0.7009  | 2.345665 | 0.08528  | H | -3.25686 | 3.35422  | 0.745045 |
| C | 0.700913 | 2.345663 | -0.08527 | C | -6.05393 | 3.22452  | 1.120225 |
| C | 1.470921 | 1.193299 | -0.18967 | C | -5.8993  | 3.731116 | 2.568803 |
| H | -1.19092 | 3.312466 | 0.133904 | C | -6.87609 | 4.861471 | 2.905927 |
| H | 1.19094  | 3.312462 | -0.13384 | H | -5.91785 | 4.071128 | 0.431695 |
| C | 2.914194 | 1.24045  | -0.38518 | H | -7.08053 | 2.871957 | 0.978781 |
| C | 3.682871 | 2.362083 | -0.63575 | H | -4.86783 | 4.072971 | 2.728471 |
| C | 5.077621 | 2.126608 | -0.76795 | H | -6.05127 | 2.888553 | 3.255676 |
| C | 5.393766 | 0.785178 | -0.61718 | H | -7.91656 | 4.535059 | 2.788076 |
| S | 3.954806 | -0.17058 | -0.30827 | H | -6.72472 | 5.726981 | 2.248781 |
| H | 3.25686  | 3.354212 | -0.7451  | C | -6.70401 | -2.71262 | 3.185269 |
| C | 6.053931 | 3.224512 | -1.12025 | C | -7.89612 | -3.44025 | 3.218975 |
| C | 5.89932  | 3.731095 | -2.56883 | C | -9.06834 | -3.25663 | 2.481519 |
| C | 6.876116 | 4.861448 | -2.90596 | C | -9.35625 | -2.272   | 1.531307 |
| H | 5.917846 | 4.071126 | -0.43173 | C | -8.55103 | -1.24075 | 1.055732 |
| H | 7.080533 | 2.871953 | -0.97879 | C | -7.13064 | -0.96434 | 1.416783 |
| H | 4.86785  | 4.072947 | -2.72851 | C | -6.36698 | -1.62185 | 2.377496 |
| H | 6.051304 | 2.888526 | -3.2557  | C | -6.70997 | 0.145304 | 0.633086 |
| H | 7.916586 | 4.535038 | -2.78809 | C | -7.81034 | 0.542443 | -0.15366 |
| H | 6.72474  | 5.726964 | -2.24882 | C | -8.93044 | -0.27478 | 0.08541  |
| C | 6.704045 | -2.71263 | -3.18526 | H | -5.92759 | -3.044   | 3.870934 |
| C | 7.896155 | -3.44026 | -3.21895 | H | -7.91446 | -4.27086 | 3.922974 |



|   |          |          |          |   |          |          |          |
|---|----------|----------|----------|---|----------|----------|----------|
| C | 9.068363 | -3.25663 | -2.48148 | H | -9.86889 | -3.96569 | 2.679562 |
| C | 9.356264 | -2.27201 | -1.53127 | H | -10.354  | -2.31493 | 1.098841 |
| C | 8.551039 | -1.24075 | -1.0557  | H | -5.36172 | -1.23068 | 2.518578 |
| C | 7.130656 | -0.96434 | -1.41677 | C | -12.6685 | 0.291719 | -1.0256  |
| C | 6.367001 | -1.62186 | -2.37749 | C | -11.9343 | 0.097647 | -2.1595  |
| C | 6.709974 | 0.145301 | -0.63308 | C | -10.5415 | -0.14447 | -1.91611 |
| C | 7.810334 | 0.542444 | 0.153678 | C | -10.235  | -0.13069 | -0.56938 |
| C | 8.930437 | -0.27478 | -0.08538 | S | -11.6768 | 0.192991 | 0.391152 |
| H | 5.927634 | -3.04402 | -3.87093 | H | -12.3644 | 0.120673 | -3.15625 |
| H | 7.914506 | -4.27088 | -3.92294 | C | -9.56285 | -0.44577 | -3.02644 |
| H | 9.868923 | -3.9657  | -2.67951 | C | -9.79484 | -1.82198 | -3.68233 |
| H | 10.35399 | -2.31493 | -1.09879 | C | -8.81527 | -2.10311 | -4.82567 |
| H | 5.361739 | -1.23069 | -2.51858 | C | -9.63623 | 0.332476 | -3.80015 |
| C | 12.66847 | 0.291727 | 1.025661 | H | -8.53859 | -0.40497 | -2.64126 |
| C | 11.93423 | 0.097656 | 2.15956  | H | -10.8261 | -1.87942 | -4.05573 |
| C | 10.54149 | -0.14447 | 1.916153 | H | -9.7047  | -2.59982 | -2.91305 |
| C | 10.23498 | -0.13069 | 0.569418 | H | -7.77723 | -2.08544 | -4.47185 |
| S | 11.6768  | 0.192995 | -0.3911  | H | -8.90652 | -1.35218 | -5.62039 |
| H | 12.36437 | 0.120685 | 3.156311 | H | 7.794705 | 1.366573 | 0.858121 |
| C | 9.562822 | -0.44576 | 3.026475 | H | 13.72937 | 0.485803 | 0.938827 |
| C | 9.794804 | -1.82197 | 3.682365 | H | -7.79472 | 1.36657  | -0.85811 |
| C | 8.815226 | -2.1031  | 4.825702 | H | -13.7294 | 0.485793 | -0.93875 |
| H | 9.636192 | 0.332484 | 3.80018  | H | 8.997869 | -3.08645 | 5.273776 |
| H | 8.538565 | -0.40497 | 2.641288 | H | 6.74888  | 5.20184  | -3.93986 |
| H | 10.82606 | -1.87941 | 4.055784 | H | -6.74884 | 5.201872 | 3.939831 |
| H | 9.704674 | -2.59981 | 2.913084 | H | -8.99792 | -3.08646 | -5.27374 |
| H | 7.777181 | -2.08544 | 4.47187  |   |          |          |          |

**Cartesian coordinates of the DFT optimized ground-state of BTaz-4**

|   |          |          |          |   |          |          |          |
|---|----------|----------|----------|---|----------|----------|----------|
| C | 1.305033 | 0.599774 | -0.17844 | S | -13.597  | -0.70087 | 0.296129 |
| C | 1.129074 | 1.995461 | 0.046158 | H | -14.0155 | -2.10597 | -3.00693 |
| C | -0.12511 | 2.583746 | 0.161712 | C | -11.1928 | -2.29214 | -2.57606 |
| C | -1.25713 | 1.750522 | 0.073782 | C | -11.2907 | -3.82114 | -2.75056 |
| C | -1.08072 | 0.355773 | -0.15598 | C | -10.2009 | -4.38025 | -3.66989 |
| C | 0.173688 | -0.22893 | -0.29544 | H | -11.248  | -1.81863 | -3.56744 |
| C | 2.688698 | 0.236423 | -0.23679 | H | -10.2067 | -2.04472 | -2.16939 |
| C | 3.548166 | 1.290773 | -0.07361 | H | -12.2803 | -4.08158 | -3.14945 |
| S | 2.675639 | 2.821588 | 0.171562 | H | -11.2252 | -4.29506 | -1.76258 |
| S | -2.62437 | -0.4804  | -0.21688 | H | -9.20039 | -4.16481 | -3.27538 |
| C | -3.49453 | 1.038068 | 0.08585  | H | -10.2624 | -3.94032 | -4.67313 |
| C | -2.63884 | 2.100267 | 0.215736 | C | 4.994161 | 1.280606 | -0.06731 |
| O | -0.25121 | 3.932378 | 0.406924 | C | 5.86434  | 2.314516 | 0.198081 |
| O | 0.30198  | -1.58493 | -0.49026 | C | 7.246797 | 1.973089 | 0.115152 |
| H | 3.021311 | -0.78711 | -0.36789 | C | 7.441912 | 0.645737 | -0.22331 |
| H | -2.97202 | 3.10264  | 0.45709  | S | 5.897506 | -0.17748 | -0.4284  |
| C | 0.402318 | -1.99283 | -1.86936 | H | 5.522689 | 3.313284 | 0.453339 |
| C | 0.518058 | -3.50913 | -1.90335 | C | 8.34453  | 2.991087 | 0.315481 |

|   |          |          |          |   |          |          |          |
|---|----------|----------|----------|---|----------|----------|----------|
| C | 0.637242 | -4.04928 | -3.33215 | C | 8.410558 | 4.045078 | -0.8087  |
| H | -0.48797 | -1.65355 | -2.41721 | C | 9.513803 | 5.081681 | -0.57741 |
| H | 1.282267 | -1.51976 | -2.32826 | H | 8.193941 | 3.505451 | 1.275706 |
| H | -0.36074 | -3.93758 | -1.40632 | H | 9.313222 | 2.485721 | 0.382875 |
| H | 1.524043 | -3.65001 | -3.8393  | H | 7.439475 | 4.550666 | -0.89462 |
| H | -0.23926 | -3.78384 | -3.93549 | H | 8.57394  | 3.53231  | -1.76544 |
| C | -0.43221 | 4.748307 | -0.76708 | H | 10.50004 | 4.605044 | -0.52126 |
| C | -0.53401 | 6.198407 | -0.31893 | H | 9.355999 | 5.627148 | 0.361331 |
| C | -0.72868 | 7.158449 | -1.49676 | C | 8.829583 | -1.78699 | -3.78322 |
| H | 0.418737 | 4.605836 | -1.44792 | C | 9.946088 | -2.60714 | -3.96438 |
| H | -1.34336 | 4.433887 | -1.29606 | C | 11.004   | -2.8703  | -3.09093 |
| H | -1.36833 | 6.288535 | 0.387931 | C | 11.23    | -2.35219 | -1.81179 |
| H | 0.109589 | 7.103222 | -2.20177 | C | 10.45454 | -1.46806 | -1.06686 |
| H | -0.80052 | 8.193921 | -1.14793 | C | 9.131969 | -0.89114 | -1.44403 |
| C | -4.94169 | 1.061095 | 0.16675  | C | 8.468689 | -1.03684 | -2.65961 |
| C | -5.78157 | 2.1299   | -0.05487 | C | 8.691833 | -0.10596 | -0.34388 |
| C | -7.16721 | 1.85126  | 0.135632 | C | 9.691252 | -0.17594 | 0.647503 |
| C | -7.39534 | 0.535483 | 0.501259 | C | 10.76466 | -0.98648 | 0.233638 |
| S | -5.87804 | -0.34991 | 0.611218 | H | 8.141402 | -1.73187 | -4.62358 |
| H | -5.41279 | 3.101578 | -0.36807 | H | 9.999681 | -3.11426 | -4.92655 |
| C | -8.23388 | 2.911663 | -0.00622 | H | 11.7608  | -3.55995 | -3.45762 |
| C | -8.13509 | 4.022967 | 1.058362 | H | 12.14403 | -2.6871  | -1.32554 |
| C | -9.21053 | 5.099519 | 0.885755 | H | 7.53411  | -0.48649 | -2.74649 |
| H | -8.16415 | 3.369656 | -1.00392 | H | 9.638496 | 0.325859 | 1.60717  |
| H | -9.22501 | 2.450824 | 0.054434 | C | 14.3351  | -1.3682  | 1.855046 |
| H | -7.1396  | 4.484718 | 1.015085 | C | 13.42696 | -1.82972 | 2.763116 |
| H | -8.21761 | 3.5683   | 2.054001 | C | 12.06833 | -1.77601 | 2.306249 |
| H | -10.217  | 4.669854 | 0.95862  | C | 11.9659  | -1.26277 | 1.027642 |
| H | -9.12986 | 5.588554 | -0.09307 | S | 13.55783 | -0.83832 | 0.400788 |
| C | -8.63815 | -1.80985 | 4.171266 | H | 13.70651 | -2.20758 | 3.74192  |
| C | -9.77276 | -2.58077 | 4.435886 | C | 10.91365 | -2.28977 | 3.133482 |
| C | -10.8981 | -2.80529 | 3.638952 | C | 10.93628 | -3.81938 | 3.327924 |
| C | -11.1886 | -2.28818 | 2.372782 | C | 9.774709 | -4.32098 | 4.190897 |
| C | -10.4295 | -1.44295 | 1.567894 | H | 10.92925 | -1.80731 | 4.121886 |
| C | -9.06243 | -0.91796 | 1.84952  | H | 9.964992 | -2.00623 | 2.665873 |
| C | -8.32418 | -1.08308 | 3.01851  | H | 11.89049 | -4.11626 | 3.783454 |
| C | -8.66569 | -0.1603  | 0.714083 | H | 10.90526 | -4.30206 | 2.342481 |
| C | -9.73141 | -0.19675 | -0.20722 | H | 8.807397 | -4.06698 | 3.740593 |
| C | -10.8063 | -0.96003 | 0.285797 | H | 9.80094  | -3.87314 | 5.192133 |
| H | -7.89191 | -1.77856 | 4.961736 | H | -15.5638 | -1.117   | -1.12701 |
| H | -9.78147 | -3.07854 | 5.404346 | H | 15.41092 | -1.30851 | 1.953627 |
| H | -11.6561 | -3.45967 | 4.063175 | H | 9.81032  | -5.40961 | 4.311902 |
| H | -12.1464 | -2.58862 | 1.95273  | H | 9.544431 | 5.817117 | -1.38922 |
| H | -7.36372 | -0.57221 | 3.036695 | H | 1.391426 | -3.80694 | -1.30986 |
| H | -9.72349 | 0.295173 | -1.17349 | H | 0.719969 | -5.14115 | -3.33019 |
| C | -14.487  | -1.21807 | -1.09685 | H | 0.376236 | 6.45618  | 0.236142 |
| C | -13.6582 | -1.72729 | -2.05409 | H | -1.64627 | 6.931206 | -2.05312 |
| C | -12.2719 | -1.72208 | -1.68604 | H | -9.12305 | 5.875653 | 1.654435 |

|   |          |          |          |   |          |          |          |
|---|----------|----------|----------|---|----------|----------|----------|
| C | -12.0669 | -1.19641 | -0.42489 | H | -10.2898 | -5.46732 | -3.77687 |
|---|----------|----------|----------|---|----------|----------|----------|

**Cartesian coordinates of the DFT optimized ground-state of protonated BTaz-1**

|   |          |          |          |   |          |          |          |
|---|----------|----------|----------|---|----------|----------|----------|
| C | -2.66199 | -0.05019 | 1.294945 | C | 3.33488  | -0.5176  | 0.245912 |
| C | -1.1537  | 3.778062 | -0.46078 | C | -3.57485 | -0.03284 | 2.323853 |
| C | -0.06326 | 3.940897 | -1.30839 | C | -4.91953 | -0.49892 | 2.167404 |
| C | 0.992124 | 3.047798 | -1.5567  | C | -5.37772 | -0.99117 | 0.9736   |
| C | 1.236697 | 1.79423  | -1.00852 | C | -4.471   | -1.02528 | -0.1252  |
| C | 0.474407 | 1.093044 | -0.05728 | C | -3.10948 | -0.5546  | 0.031789 |
| C | -0.75564 | 1.504624 | 0.531723 | N | -2.37585 | -0.63975 | -1.08426 |
| C | -1.4666  | 2.680571 | 0.356097 | S | -3.36801 | -1.28112 | -2.2361  |
| C | -1.226   | 0.412868 | 1.480351 | N | -4.74089 | -1.46247 | -1.36139 |
| C | -0.1651  | -0.63452 | 1.30285  | N | 3.657921 | 0.716999 | 0.653119 |
| C | 0.815927 | -0.23888 | 0.451453 | S | 5.305677 | 0.77766  | 0.673199 |
| H | -1.86145 | 4.602819 | -0.4309  | N | 5.65344  | -0.74098 | 0.170156 |
| H | -0.02526 | 4.877378 | -1.85923 | H | 0.898213 | -2.77165 | -0.45278 |
| H | 1.72706  | 3.388193 | -2.2822  | H | 2.852043 | -4.18985 | -0.93365 |
| H | 2.13136  | 1.29154  | -1.35816 | H | 5.17402  | -3.31988 | -0.67138 |
| H | -2.39304 | 2.758493 | 0.921891 | H | -3.27241 | 0.337481 | 3.300543 |
| C | 2.005959 | -1.03787 | 0.09658  | H | -5.5816  | -0.4576  | 3.026592 |
| C | 1.890174 | -2.34875 | -0.32065 | H | -6.39344 | -1.34833 | 0.844336 |
| C | 3.02399  | -3.1703  | -0.60311 | H | -0.18122 | -1.57556 | 1.841199 |
| C | 4.306044 | -2.7032  | -0.46558 | H | -1.14569 | 0.808833 | 2.507228 |
| C | 4.48237  | -1.35851 | -0.0321  |   |          |          |          |

**Cartesian coordinates of the DFT optimized ground-state of protonated BTaz-2**

|   |          |          |          |   |          |          |          |
|---|----------|----------|----------|---|----------|----------|----------|
| C | -6.6071  | -1.75816 | -0.46294 | H | 4.331097 | 1.868155 | -1.58991 |
| C | -5.22312 | -1.45332 | -0.09618 | C | 1.671798 | 2.781684 | -1.30161 |
| C | -4.18573 | -2.34559 | 0.084786 | C | 2.224951 | 4.140239 | -0.8219  |
| C | -2.92927 | -1.76165 | 0.415298 | C | 1.543681 | 5.332535 | -1.50506 |
| C | -3.02241 | -0.38606 | 0.481636 | C | 2.071876 | 6.691329 | -1.02653 |
| S | -4.64266 | 0.180739 | 0.159788 | H | 1.786564 | 2.715077 | -2.39222 |
| H | -4.31335 | -3.41933 | -0.00076 | H | 0.594242 | 2.749493 | -1.10594 |
| C | -1.68619 | -2.59105 | 0.635232 | H | 3.306976 | 4.181025 | -1.00592 |
| C | -1.09785 | -3.1751  | -0.66582 | H | 2.099537 | 4.213485 | 0.267536 |
| C | 0.162441 | -4.01542 | -0.42674 | H | 0.458447 | 5.282057 | -1.32994 |
| C | 0.743249 | -4.61852 | -1.71241 | H | 1.678664 | 5.25188  | -2.59359 |
| H | -0.9152  | -1.99693 | 1.139685 | H | 3.157323 | 6.739389 | -1.19726 |
| H | -1.92618 | -3.41728 | 1.318355 | H | 1.932128 | 6.772601 | 0.061782 |
| H | -0.87009 | -2.35303 | -1.35873 | C | 1.396549 | 7.884025 | -1.71595 |
| H | -1.862   | -3.78682 | -1.16407 | C | 1.916567 | 9.244309 | -1.23375 |
| H | -0.06967 | -4.82392 | 0.282244 | C | 1.243401 | 10.43661 | -1.92577 |
| H | 0.927932 | -3.3926  | 0.060398 | C | 1.765494 | 11.79127 | -1.43674 |
| H | 0.969457 | -3.80976 | -2.42305 | H | 1.542247 | 7.804068 | -2.8033  |
| H | -0.02071 | -5.24365 | -2.19729 | H | 0.309932 | 7.831313 | -1.55112 |
| C | 2.008076 | -5.45405 | -1.47615 | H | 3.003314 | 9.296963 | -1.39679 |
| C | 2.591653 | -6.05713 | -2.7602  | H | 1.769095 | 9.325622 | -0.14628 |

|   |          |          |          |   |          |          |          |
|---|----------|----------|----------|---|----------|----------|----------|
| C | 3.858379 | -6.89003 | -2.52521 | H | 0.157214 | 10.38225 | -1.76477 |
| C | 4.435286 | -7.48773 | -3.81232 | H | 1.393724 | 10.35624 | -3.01168 |
| H | 2.770425 | -4.8277  | -0.98922 | H | 1.26564  | 12.62045 | -1.94946 |
| H | 1.780848 | -6.26272 | -0.76572 | H | 2.842948 | 11.88969 | -1.61703 |
| H | 2.816629 | -5.24897 | -3.47242 | H | 1.597764 | 11.91606 | -0.35987 |
| H | 1.830174 | -6.6851  | -3.24593 | C | 5.556594 | -0.37734 | -0.30061 |
| H | 3.633198 | -7.6984  | -1.81512 | C | 6.424607 | -0.03884 | -1.32597 |
| H | 4.619053 | -6.26231 | -2.03902 | C | 7.744956 | -0.563   | -1.43534 |
| H | 5.336457 | -8.07712 | -3.61005 | C | 8.249446 | -1.46185 | -0.5303  |
| H | 4.704955 | -6.70234 | -4.5292  | C | 7.400692 | -1.86337 | 0.538012 |
| H | 3.709553 | -8.1476  | -4.30299 | C | 6.057257 | -1.32662 | 0.65764  |
| C | -1.87803 | 0.558653 | 4.702586 | C | -6.99416 | -3.02801 | -0.85911 |
| C | -0.60861 | 0.668391 | 5.261101 | C | -8.33488 | -3.36237 | -1.20615 |
| C | 0.625835 | 0.810772 | 4.605117 | C | -9.34709 | -2.43671 | -1.18324 |
| C | 0.904735 | 0.8295   | 3.243444 | C | -9.01231 | -1.10962 | -0.79729 |
| C | 0.009145 | 0.700889 | 2.165879 | C | -7.64884 | -0.76628 | -0.43782 |
| C | -1.41231 | 0.61871  | 2.235347 | N | -7.49576 | 0.518462 | -0.10402 |
| C | -2.23912 | 0.559141 | 3.345773 | S | -8.97954 | 1.220529 | -0.24273 |
| C | -1.96199 | 0.640051 | 0.815323 | N | -9.85924 | -0.07499 | -0.72527 |
| C | -0.7095  | 0.6233   | -0.00894 | N | 5.386139 | -1.80577 | 1.709244 |
| C | 0.419456 | 0.686507 | 0.753796 | S | 6.399593 | -2.85633 | 2.474081 |
| H | -2.70245 | 0.476177 | 5.406684 | N | 7.714568 | -2.73569 | 1.503956 |
| H | -0.56482 | 0.658264 | 6.347313 | H | 6.092079 | 0.647955 | -2.09739 |
| H | 1.489678 | 0.916531 | 5.257181 | H | 8.356654 | -0.23751 | -2.2713  |
| H | 1.949751 | 0.949857 | 2.971718 | H | 9.250526 | -1.87067 | -0.60871 |
| H | -3.30413 | 0.486949 | 3.133014 | H | -6.24979 | -3.81488 | -0.92337 |
| C | 4.215992 | 0.203298 | -0.20931 | H | -8.54596 | -4.38536 | -1.50278 |
| C | 3.721874 | 1.284189 | -0.90908 | H | -10.3689 | -2.68126 | -1.4508  |
| C | 2.355498 | 1.596917 | -0.66221 | H | -0.72972 | 0.570672 | -1.09093 |
| C | 1.79895  | 0.731843 | 0.264838 | H | -2.42621 | 1.636924 | 0.693135 |
| S | 2.964198 | -0.45908 | 0.823642 |   |          |          |          |

**Cartesian coordinates of the DFT optimized ground-state of protonated BTaz-3**

|   |          |          |          |   |          |          |          |
|---|----------|----------|----------|---|----------|----------|----------|
| N | 1.468735 | -1.55415 | -0.43034 | H | 9.207683 | -1.14488 | 5.642174 |
| C | 0.890928 | -0.36723 | -0.23757 | C | -2.80752 | 0.67414  | 0.233908 |
| C | -0.55549 | -0.45149 | -0.10852 | C | -3.66455 | 1.726336 | 0.503555 |
| N | -1.02227 | -1.69904 | -0.20979 | C | -5.04591 | 1.393117 | 0.552368 |
| S | 0.276907 | -2.68132 | -0.44755 | C | -5.24665 | 0.049245 | 0.300199 |
| C | -1.35869 | 0.71789  | 0.105289 | S | -3.74212 | -0.79837 | 0.030516 |
| C | -0.64317 | 1.909832 | 0.180541 | H | -3.31541 | 2.739417 | 0.670952 |
| C | 0.757065 | 1.994745 | 0.062137 | C | -6.11152 | 2.430203 | 0.819991 |
| C | 1.585921 | 0.894222 | -0.15934 | C | -6.3689  | 3.369292 | -0.37709 |
| H | -1.17958 | 2.840198 | 0.336597 | C | -7.43621 | 4.425729 | -0.07927 |
| H | 1.201063 | 2.979888 | 0.151161 | H | -7.05395 | 1.948421 | 1.103525 |
| C | 3.020814 | 1.024865 | -0.30028 | H | -5.809   | 3.035765 | 1.685286 |
| C | 3.743239 | 2.208285 | -0.36708 | H | -6.66953 | 2.768717 | -1.24585 |
| C | 5.14246  | 2.060859 | -0.50163 | H | -5.42795 | 3.858905 | -0.65865 |

|   |          |          |          |   |          |          |          |
|---|----------|----------|----------|---|----------|----------|----------|
| C | 5.521181 | 0.718591 | -0.5385  | H | -7.14799 | 5.054217 | 0.771991 |
| S | 4.125197 | -0.33536 | -0.40405 | H | -8.40113 | 3.961708 | 0.159749 |
| H | 3.270379 | 3.184309 | -0.34596 | C | -7.07965 | -1.50199 | 4.057729 |
| C | 6.06956  | 3.242144 | -0.67699 | C | -8.40346 | -1.37655 | 4.491634 |
| C | 5.765527 | 4.074802 | -1.93925 | C | -9.53637 | -1.03729 | 3.74487  |
| C | 6.716912 | 5.263946 | -2.0997  | C | -9.63926 | -0.70158 | 2.392864 |
| H | 6.004847 | 3.895992 | 0.205    | C | -8.61363 | -0.60375 | 1.441453 |
| H | 7.105935 | 2.896163 | -0.72847 | C | -7.23175 | -0.90771 | 1.621881 |
| H | 4.728621 | 4.435057 | -1.90353 | C | -6.56183 | -1.30479 | 2.773157 |
| H | 5.831828 | 3.421811 | -2.81904 | C | -6.52617 | -0.75801 | 0.281776 |
| H | 7.758761 | 4.930867 | -2.17693 | C | -7.63111 | -0.26527 | -0.60588 |
| H | 6.65008  | 5.946557 | -1.24356 | C | -8.82646 | -0.20128 | 0.040295 |
| C | 6.990171 | -2.61657 | -3.25817 | H | -6.35906 | -1.8031  | 4.813985 |
| C | 8.215668 | -3.2841  | -3.31865 | H | -8.57789 | -1.58578 | 5.544063 |
| C | 9.379012 | -3.06345 | -2.57794 | H | -10.4745 | -1.03416 | 4.294898 |
| C | 9.619838 | -2.09149 | -1.60213 | H | -10.6402 | -0.48506 | 2.030294 |
| C | 8.763695 | -1.11899 | -1.09206 | H | -5.49228 | -1.47046 | 2.65704  |
| C | 7.330555 | -0.91285 | -1.42745 | C | -12.2164 | 1.421495 | -1.10329 |
| C | 6.600475 | -1.57285 | -2.41244 | C | -11.9549 | 0.391843 | -1.9585  |
| C | 6.860972 | 0.153861 | -0.60288 | C | -10.7477 | -0.32182 | -1.65882 |
| C | 7.954003 | 0.590291 | 0.178818 | C | -10.1098 | 0.198112 | -0.54805 |
| C | 9.107868 | -0.15876 | -0.09621 | S | -10.9965 | 1.568016 | 0.11493  |
| H | 6.229676 | -2.96036 | -3.95521 | H | -12.6004 | 0.139248 | -2.79303 |
| H | 8.272848 | -4.08905 | -4.04921 | C | -10.3009 | -1.52225 | -2.4579  |
| H | 10.21438 | -3.72352 | -2.79846 | C | -11.2619 | -2.72416 | -2.34404 |
| H | 10.62129 | -2.09246 | -1.17742 | C | -10.8062 | -3.91965 | -3.18538 |
| H | 5.577856 | -1.22845 | -2.54718 | H | -10.2146 | -1.23592 | -3.51542 |
| C | 12.82933 | 0.558055 | 0.966881 | H | -9.29939 | -1.83618 | -2.1431  |
| C | 12.1173  | 0.344071 | 2.111287 | H | -12.2688 | -2.41692 | -2.65408 |
| C | 10.73281 | 0.045633 | 1.887307 | H | -11.3441 | -3.01695 | -1.28892 |
| C | 10.4124  | 0.03645  | 0.542844 | H | -9.81512 | -4.27259 | -2.87484 |
| S | 11.8285  | 0.407886 | -0.43771 | H | -10.7472 | -3.65811 | -4.24853 |
| H | 12.55905 | 0.392374 | 3.101723 | H | 7.906556 | 1.388292 | 0.91037  |
| C | 9.782849 | -0.28299 | 3.014634 | H | 13.87985 | 0.796095 | 0.865294 |
| C | 10.10616 | -1.62084 | 3.710636 | H | -7.46684 | -0.00065 | -1.6438  |
| C | 9.155897 | -1.92493 | 4.872589 | H | -13.0487 | 2.112632 | -1.11887 |
| H | 9.81358  | 0.521938 | 3.763381 | H | -6.26274 | -1.78011 | -0.04752 |
| H | 8.754374 | -0.31846 | 2.639732 | H | 9.404362 | -2.87979 | 5.34904  |
| H | 11.14144 | -1.60205 | 4.075689 | H | 6.483473 | 5.838372 | -3.00286 |
| H | 10.05916 | -2.42745 | 2.967578 | H | -7.58934 | 5.083561 | -0.94121 |
| H | 8.115334 | -1.98384 | 4.530201 | H | -11.5036 | -4.75812 | -3.08718 |

**Cartesian coordinates of the DFT optimized ground-state of protonated BTaz-4**

|   |          |          |          |   |          |          |          |
|---|----------|----------|----------|---|----------|----------|----------|
| C | 1.421424 | 0.250647 | -0.17928 | H | -14.2881 | -1.21674 | -3.19177 |
| C | 1.193323 | 1.598419 | 0.230394 | C | -11.9882 | -2.63039 | -2.25946 |
| C | -0.07948 | 2.114362 | 0.439459 | C | -12.912  | -3.81646 | -1.91139 |
| C | -1.1776  | 1.250479 | 0.24839  | C | -12.3484 | -5.15748 | -2.38961 |

|   |          |          |          |   |          |          |          |
|---|----------|----------|----------|---|----------|----------|----------|
| C | -0.94912 | -0.09825 | -0.15    | H | -11.827  | -2.61317 | -3.34636 |
| C | 0.323187 | -0.61468 | -0.36344 | H | -11.0049 | -2.80013 | -1.80677 |
| C | 2.810926 | -0.02364 | -0.36515 | H | -13.9011 | -3.65126 | -2.35715 |
| C | 3.630503 | 1.045489 | -0.09517 | H | -13.0678 | -3.84064 | -0.82468 |
| S | 2.705643 | 2.47099  | 0.423948 | H | -11.3729 | -5.36641 | -1.93357 |
| S | -2.46115 | -0.97214 | -0.3463  | H | -12.2147 | -5.16707 | -3.47784 |
| C | -3.38247 | 0.459467 | 0.152989 | C | 5.067364 | 1.119314 | -0.18229 |
| C | -2.56727 | 1.529125 | 0.424921 | C | 5.88007  | 2.230069 | -0.08157 |
| O | -0.27043 | 3.409263 | 0.853943 | C | 7.270197 | 1.973108 | -0.23046 |
| O | 0.488156 | -1.91091 | -0.78321 | C | 7.535753 | 0.62664  | -0.44976 |
| H | 3.181431 | -0.97895 | -0.7185  | S | 6.043934 | -0.31046 | -0.45049 |
| H | -2.93362 | 2.485295 | 0.779655 | H | 5.483768 | 3.228579 | 0.075856 |
| C | 0.818034 | -2.85933 | 0.256687 | C | 8.299079 | 3.079753 | -0.23067 |
| C | 0.9699   | -4.22787 | -0.38851 | C | 8.120402 | 4.076735 | -1.39422 |
| C | 1.322831 | -5.31308 | 0.633937 | C | 9.160503 | 5.200552 | -1.36637 |
| H | 1.748405 | -2.5507  | 0.752366 | H | 8.244287 | 3.629463 | 0.720192 |
| H | 0.018389 | -2.86268 | 1.010394 | H | 9.305234 | 2.653743 | -0.28444 |
| H | 1.746227 | -4.16606 | -1.16109 | H | 7.111057 | 4.507818 | -1.35884 |
| H | 0.545986 | -5.40948 | 1.402041 | H | 8.186415 | 3.529597 | -2.34346 |
| H | 2.268905 | -5.09327 | 1.142934 | H | 10.17922 | 4.800667 | -1.43593 |
| C | -0.37555 | 4.383009 | -0.20946 | H | 9.094797 | 5.780533 | -0.43764 |
| C | -0.53253 | 5.756756 | 0.423313 | C | 8.775931 | -2.34456 | -3.65526 |
| C | -0.66822 | 6.863382 | -0.62804 | C | 9.93728  | -3.10594 | -3.80729 |
| H | 0.524912 | 4.3389   | -0.8364  | C | 11.09316 | -3.12071 | -3.02356 |
| H | -1.24026 | 4.136073 | -0.84199 | C | 11.39341 | -2.34884 | -1.89654 |
| H | -1.41223 | 5.743684 | 1.079079 | C | 10.61576 | -1.395   | -1.24597 |
| H | 0.21277  | 6.907446 | -1.27916 | C | 9.218379 | -1.00083 | -1.56563 |
| H | -0.77603 | 7.842258 | -0.15006 | C | 8.458845 | -1.42007 | -2.65454 |
| C | -4.82774 | 0.43105  | 0.229331 | C | 8.82149  | -0.04627 | -0.58201 |
| C | -5.70447 | 1.495548 | 0.211904 | C | 9.921451 | 0.149161 | 0.280372 |
| C | -7.08128 | 1.142305 | 0.323688 | C | 11.01331 | -0.64853 | -0.09817 |
| C | -7.25281 | -0.22449 | 0.417983 | H | 8.008247 | -2.49711 | -4.41014 |
| S | -5.71962 | -1.06741 | 0.387997 | H | 9.94272  | -3.78266 | -4.65992 |
| H | -5.36858 | 2.52104  | 0.099858 | H | 11.8707  | -3.81256 | -3.33816 |
| C | -8.18021 | 2.178687 | 0.295898 | H | 12.37705 | -2.51642 | -1.46342 |
| C | -8.39342 | 2.808179 | -1.09641 | H | 7.476182 | -0.96227 | -2.74257 |
| C | -9.49642 | 3.869918 | -1.10147 | H | 9.921658 | 0.819459 | 1.131792 |
| H | -9.12564 | 1.74405  | 0.640101 | C | 14.74895 | -0.4818  | 1.12991  |
| H | -7.93466 | 2.975615 | 1.011306 | C | 13.97995 | -0.78489 | 2.216075 |
| H | -8.63565 | 2.013955 | -1.81477 | C | 12.58147 | -0.90285 | 1.923852 |
| H | -7.44941 | 3.250092 | -1.43959 | C | 12.30785 | -0.68373 | 0.586298 |
| H | -9.26754 | 4.686089 | -0.40558 | S | 13.78718 | -0.32215 | -0.30053 |
| H | -10.4632 | 3.442182 | -0.8084  | H | 14.38971 | -0.92662 | 3.211293 |
| C | -9.43195 | -0.7759  | 4.313024 | C | 11.5678  | -1.2958  | 2.972299 |
| C | -10.7872 | -0.65115 | 4.578819 | C | 11.72298 | -2.75459 | 3.448967 |
| C | -11.8615 | -0.61683 | 3.661703 | C | 10.71093 | -3.13063 | 4.535068 |
| C | -11.8351 | -0.64261 | 2.277598 | H | 11.66428 | -0.62734 | 3.840126 |
| C | -10.7131 | -0.70399 | 1.421269 | H | 10.55295 | -1.15677 | 2.585109 |

|   |          |          |          |   |          |          |          |
|---|----------|----------|----------|---|----------|----------|----------|
| C | -9.34978 | -0.86129 | 1.802346 | H | 12.74303 | -2.90975 | 3.824301 |
| C | -8.78556 | -0.89665 | 3.067332 | H | 11.61054 | -3.42284 | 2.585349 |
| C | -8.52078 | -1.03899 | 0.532617 | H | 9.680934 | -3.01576 | 4.175494 |
| C | -9.54252 | -0.83947 | -0.54838 | H | 10.82474 | -2.49502 | 5.421911 |
| C | -10.7972 | -0.67    | -0.04355 | H | -14.9498 | 1.078625 | -2.0993  |
| H | -8.77713 | -0.79773 | 5.180986 | H | 15.82066 | -0.34032 | 1.085372 |
| H | -11.0643 | -0.58632 | 5.627867 | H | -8.22775 | -2.10468 | 0.520106 |
| H | -12.8509 | -0.55542 | 4.108649 | H | 10.83871 | -4.17137 | 4.853004 |
| H | -12.7998 | -0.60388 | 1.779128 | H | 9.016963 | 5.893292 | -2.20285 |
| H | -7.70417 | -1.01252 | 3.098671 | H | 1.428284 | -6.28701 | 0.145375 |
| H | -9.28285 | -0.83734 | -1.6001  | H | 0.034118 | -4.4783  | -0.90309 |
| C | -14.1043 | 0.454505 | -1.84222 | H | 0.335265 | 5.94693  | 1.066217 |
| C | -13.7332 | -0.73703 | -2.39241 | H | -1.54631 | 6.70643  | -1.26616 |
| C | -12.5409 | -1.29496 | -1.82347 | H | -9.6161  | 4.306912 | -2.09838 |
| C | -12.0269 | -0.49026 | -0.82396 | H | -13.0205 | -5.9819  | -2.12965 |
| S | -13.011  | 0.952539 | -0.59696 |   |          |          |          |

### Excitation energies and oscillator strengths from the ground-state structures ( $S_0$ ) of BTAzs and protonated BTAzs

#### BTaz-2

|                  |           |           |           |          |              |
|------------------|-----------|-----------|-----------|----------|--------------|
| Excited State 1: | Singlet-A | 2.1814 eV | 568.37 nm | f=0.0105 | <S**2>=0.000 |
| 208 ->210        | 0.70433   |           |           |          |              |
| Excited State 2: | Singlet-A | 2.6981 eV | 459.52 nm | f=0.2358 | <S**2>=0.000 |
| 207 ->210        | 0.69687   |           |           |          |              |
| Excited State 3: | Singlet-A | 2.7185 eV | 456.08 nm | f=0.0013 | <S**2>=0.000 |
| 207 ->209        | 0.69568   |           |           |          |              |
| Excited State 4: | Singlet-A | 2.8607 eV | 433.41 nm | f=0.0002 | <S**2>=0.000 |
| 207 ->211        | 0.67675   |           |           |          |              |
| 208 ->212        | -0.18565  |           |           |          |              |
| Excited State 5: | Singlet-A | 3.2041 eV | 386.96 nm | f=0.0982 | <S**2>=0.000 |
| 203 ->211        | 0.13771   |           |           |          |              |
| 205 ->211        | -0.12593  |           |           |          |              |
| 206 ->210        | -0.24082  |           |           |          |              |
| 207 ->211        | 0.16765   |           |           |          |              |
| 208 ->212        | 0.60917   |           |           |          |              |

\*\*\*

#### BTaz-3

|                  |           |           |           |          |              |
|------------------|-----------|-----------|-----------|----------|--------------|
| Excited State 1: | Singlet-A | 2.0654 eV | 600.29 nm | f=0.0085 | <S**2>=0.000 |
| 231 -> 236       | 0.12427   |           |           |          |              |
| 232 -> 235       | -0.37847  |           |           |          |              |
| 233 -> 236       | 0.57790   |           |           |          |              |
| Excited State 2: | Singlet-A | 2.0656 eV | 600.24 nm | f=0.0001 | <S**2>=0.000 |
| 231 -> 235       | 0.12419   |           |           |          |              |
| 232 -> 236       | -0.37814  |           |           |          |              |
| 233 -> 235       | 0.57794   |           |           |          |              |
| Excited State 3: | Singlet-A | 2.2138 eV | 560.05 nm | f=0.0052 | <S**2>=0.000 |
| 232 -> 234       | 0.70418   |           |           |          |              |
| Excited State 4: | Singlet-A | 2.5654 eV | 483.29 nm | f=0.0844 | <S**2>=0.000 |
| 231 -> 234       | 0.69451   |           |           |          |              |
| Excited State 5: | Singlet-A | 2.6008 eV | 476.71 nm | f=0.0004 | <S**2>=0.000 |
| 231 -> 235       | -0.26201  |           |           |          |              |
| 232 -> 236       | 0.51312   |           |           |          |              |
| 233 -> 235       | 0.39745   |           |           |          |              |
| Excited State 6: | Singlet-A | 2.6013 eV | 476.63 nm | f=0.0001 | <S**2>=0.000 |
| 231 -> 236       | -0.25881  |           |           |          |              |

232 -> 235 0.50907  
 233 -> 236 0.39381  
 Excited State 7: Singlet-A 2.9779 eV 416.35 nm f=0.1228 <S\*\*2>=0.000  
 230 -> 235 -0.16209  
 231 -> 236 0.44615  
 232 -> 235 0.23556  
 233 -> 237 0.44476  
 Excited State 8: Singlet-A 3.0539 eV 405.98 nm f=0.2957 <S\*\*2>=0.000  
 231 -> 236 -0.42131  
 232 -> 235 -0.17123  
 233 -> 237 0.51224  
 233 -> 239 -0.10091  
  
 Excited State 9: Singlet-A 3.4744 eV 356.85 nm f=0.4237 <S\*\*2>=0.000  
 225 -> 234 -0.15552  
 229 -> 234 -0.21152  
 230 -> 235 -0.13796  
 232 -> 238 0.23611  
 233 -> 239 0.56513

\*\*\*

#### BTaz-4

Excited State 1: Singlet-A 2.0915 eV 592.81 nm f=0.0063 <S\*\*2>=0.000  
 277 -> 281 0.20896  
 278 -> 281 -0.44702  
 279 -> 281 0.49822  
 Excited State 2: Singlet-A 2.5097 eV 494.03 nm f=0.0019 <S\*\*2>=0.000  
 277 -> 280 -0.35979  
 278 -> 280 -0.36854  
 279 -> 280 0.46138  
 Excited State 3: Singlet-A 2.5338 eV 489.31 nm f=0.0016 <S\*\*2>=0.000  
 277 -> 281 -0.29462  
 278 -> 281 0.39453  
 279 -> 281 0.49080  
 Excited State 4: Singlet-A 2.6771 eV 463.13 nm f=1.5955 <S\*\*2>=0.000  
 279 -> 282 0.69602  
 Excited State 5: Singlet-A 2.8476 eV 435.40 nm f=0.0080 <S\*\*2>=0.000  
 275 -> 280 -0.11870  
 277 -> 280 0.51502  
 278 -> 280 -0.44671

\*\*\*

#### Protonated BTaz-2

Excited State 1: Singlet-A 1.2022 eV 1031.29 nm f=0.0015 <S\*\*2>=0.000  
 207 -> 209 0.66903  
 208 -> 210 -0.21835  
 Excited State 2: Singlet-A 1.2650 eV 980.11 nm f=0.0325 <S\*\*2>=0.000  
 207 -> 209 0.21872  
 208 -> 210 0.66754  
 Excited State 3: Singlet-A 1.3337 eV 929.65 nm f=0.0063 <S\*\*2>=0.000  
 207 -> 210 0.70312  
 Excited State 4: Singlet-A 2.1079 eV 588.18 nm f=0.0004 <S\*\*2>=0.000  
 206 -> 209 0.69652  
 Excited State 5: Singlet-A 2.1955 eV 564.72 nm f=0.0003 <S\*\*2>=0.000  
 205 -> 209 0.69946  
 Excited State 6: Singlet-A 2.2638 eV 547.69 nm f=0.0018 <S\*\*2>=0.000  
 206 -> 210 0.69732  
 Excited State 7: Singlet-A 2.3606 eV 525.22 nm f=0.0028 <S\*\*2>=0.000  
 205 -> 210 0.69961  
 Excited State 8: Singlet-A 2.4567 eV 504.68 nm f=0.0003 <S\*\*2>=0.000  
 204 -> 209 0.69342

\*\*\*

#### Protonated BTaz-3

Excited State 1: Singlet-A 0.3824 eV 3241.90 nm f=0.1591 <S\*\*2>=0.000



|                   |           |           |            |          |              |
|-------------------|-----------|-----------|------------|----------|--------------|
| 233 -> 234        | 0.44119   |           |            |          |              |
| 233 -> 235        | 0.64904   |           |            |          |              |
| 233 <- 234        | -0.24373  |           |            |          |              |
| 233 <- 235        | -0.23516  |           |            |          |              |
| Excited State 2:  | Singlet-A | 0.7380 eV | 1680.00 nm | f=0.0009 | <S**2>=0.000 |
| 232 -> 234        | 0.67561   |           |            |          |              |
| 232 -> 235        | -0.14458  |           |            |          |              |
| Excited State 3:  | Singlet-A | 0.8485 eV | 1461.15 nm | f=0.0133 | <S**2>=0.000 |
| 232 -> 234        | 0.15520   |           |            |          |              |
| 232 -> 235        | 0.68514   |           |            |          |              |
| Excited State 4:  | Singlet-A | 1.3146 eV | 943.16 nm  | f=0.0020 | <S**2>=0.000 |
| 230 -> 234        | -0.25370  |           |            |          |              |
| 231 -> 234        | 0.63065   |           |            |          |              |
| 232 -> 234        | -0.11953  |           |            |          |              |
| Excited State 5:  | Singlet-A | 1.4010 eV | 884.99 nm  | f=0.0174 | <S**2>=0.000 |
| 230 -> 235        | -0.23814  |           |            |          |              |
| 231 -> 235        | 0.63479   |           |            |          |              |
| 233 -> 236        | 0.13737   |           |            |          |              |
| Excited State 6:  | Singlet-A | 1.4786 eV | 838.51 nm  | f=0.0008 | <S**2>=0.000 |
| 230 -> 234        | 0.64175   |           |            |          |              |
| 231 -> 234        | 0.27367   |           |            |          |              |
| Excited State 7:  | Singlet-A | 1.5536 eV | 798.04 nm  | f=0.0053 | <S**2>=0.000 |
| 230 -> 235        | 0.63871   |           |            |          |              |
| 231 -> 235        | 0.27056   |           |            |          |              |
| Excited State 8:  | Singlet-A | 1.6216 eV | 764.60 nm  | f=0.3237 | <S**2>=0.000 |
| 230 -> 235        | 0.13293   |           |            |          |              |
| 233 -> 236        | 0.68088   |           |            |          |              |
| Excited State 9:  | Singlet-A | 1.8098 eV | 685.07 nm  | f=0.0011 | <S**2>=0.000 |
| 229 -> 234        | 0.68109   |           |            |          |              |
| 229 -> 235        | 0.10011   |           |            |          |              |
| Excited State 10: | Singlet-A | 1.8761 eV | 660.87 nm  | f=0.0002 | <S**2>=0.000 |
| 228 -> 234        | 0.65273   |           |            |          |              |
| 229 -> 235        | 0.22223   |           |            |          |              |

\*\*\*

#### Protonated BTaz-4

|                  |           |           |            |          |              |
|------------------|-----------|-----------|------------|----------|--------------|
| Excited State 1: | Singlet-A | 0.2960 eV | 4187.95 nm | f=0.0929 | <S**2>=0.000 |
| 279 -> 280       | 0.61049   |           |            |          |              |
| 279 -> 281       | 0.60261   |           |            |          |              |
| 279 <- 280       | -0.48473  |           |            |          |              |
| Excited State 2: | Singlet-A | 0.5211 eV | 2379.24 nm | f=0.0436 | <S**2>=0.000 |
| 278 -> 280       | 0.68869   |           |            |          |              |
| 279 -> 280       | 0.13393   |           |            |          |              |
| Excited State 3: | Singlet-A | 0.7447 eV | 1664.80 nm | f=0.0101 | <S**2>=0.000 |
| 278 -> 281       | 0.69605   |           |            |          |              |
| Excited State 4: | Singlet-A | 0.9308 eV | 1331.98 nm | f=0.0010 | <S**2>=0.000 |
| 277 -> 280       | 0.69668   |           |            |          |              |
| Excited State 5: | Singlet-A | 1.1913 eV | 1040.76 nm | f=0.0001 | <S**2>=0.000 |
| 277 -> 281       | 0.69775   |           |            |          |              |
| Excited State 6: | Singlet-A | 1.2536 eV | 989.00 nm  | f=0.0068 | <S**2>=0.000 |
| 274 -> 280       | -0.19375  |           |            |          |              |
| 275 -> 280       | -0.23448  |           |            |          |              |
| 276 -> 280       | 0.62061   |           |            |          |              |
| Excited State 7: | Singlet-A | 1.4445 eV | 858.31 nm  | f=0.0005 | <S**2>=0.000 |
| 275 -> 280       | 0.64671   |           |            |          |              |
| 276 -> 280       | 0.27299   |           |            |          |              |
| Excited State 8: | Singlet-A | 1.5170 eV | 817.32 nm  | f=0.0080 | <S**2>=0.000 |
| 274 -> 281       | -0.19059  |           |            |          |              |
| 275 -> 281       | -0.23612  |           |            |          |              |
| 276 -> 281       | 0.62008   |           |            |          |              |
| Excited State 9: | Singlet-A | 1.6251 eV | 762.95 nm  | f=0.0027 | <S**2>=0.000 |
| 272 -> 280       | -0.10934  |           |            |          |              |
| 273 -> 280       | 0.15043   |           |            |          |              |

274 -> 280 0.63506  
275 -> 280 -0.14786  
276 -> 280 0.16736  
Excited State 10: Singlet-A 1.7250 eV 718.74 nm f=0.0003 <S\*\*2>=0.000  
275 -> 281 0.64275  
276 -> 281 0.27670

\*\*\*
